# Supplementary material
Source: HighWire-hosted journal article supplement (https://drc.bmj.com/content/9/1/e002176)
Supplement: inline-supplementary-material-1 [file inline-supplementary-material-1.pdf]

**Ethnic differences in prevalence of actionable HbA1c levels in UK Biobank: implications for screening**

Jana J Anderson, Paul Welsh, Frederick K Ho, Lyn D Ferguson, Claire E Welsh, Pierpaolo Pellicori, John GF Cleland, John Forbes, Stamatina Iliodromiti, James Boyle, Robert Lindsay, Carlos Celis-Morales, Stuart Robert Gray, Srinivasa Vittal Katikireddi, Jason Martin Regnald Gill, Jill P Pell, Naveed Sattar

**SUPPLEMENTAL MATERIAL**

**Supplemental Table S1.** Crude prevalence of pre- and undiagnosed diabetes and crude yield of HbA1c in UK Biobank by ethnic group excluding participants with cardiovascular disease.

|                              | White<br>N=397,354 | South Asian<br>N=6,937 | Black<br>N=5,355 | Chinese<br>N=1,337 | Overall<br>N=410,983 |
|------------------------------|--------------------|------------------------|------------------|--------------------|----------------------|
|                              | N (%)              | N (%)                  | N (%)            | N (%)              | N (%)                |
| Pre-diabetes                 | 11,807 (3.0)       | 712 (10.3)             | 713 (13.3)       | 103 (7.7)          | 13,335 (3.2)         |
| Undiagnosed diabetes         | 2,532 (0.6)        | 239 (3.4)              | 154 (2.9)        | 15 (1.1)           | 2,940 (0.7)          |
| Pre- or undiagnosed diabetes | 14,339 (3.6)       | 951 (13.7)             | 867 (16.2)       | 118 (8.8)          | 16,275 (4.0)         |
|                              | Yield              | Yield                  | Yield            | Yield              | Yield                |
| Pre-diabetes                 | 1 in 34            | 1 in 10                | 1 in 8           | 1 in 13            | 1 in 31              |
| Undiagnosed diabetes         | 1 in 157           | 1 in 29                | 1 in 35          | 1 in 89            | 1 in 140             |
| Pre- or undiagnosed diabetes | 1 in 28            | 1 in 7                 | 1 in 6           | 1 in 11            | 1 in 25              |

N: number

Yield: Average number needing to be tested to identify one case

**Supplementary Table S2.** Association between ethnic groups and pre- and undiagnosed diabetes

|                      | Model 1<br>OR (95% CI) | P value | Model 2<br>OR (95% CI) | P value |
|----------------------|------------------------|---------|------------------------|---------|
| Prediabetes          |                        |         |                        |         |
| White                | 1 Referent             |         | 1 Referent             |         |
| South Asian          | 3.63 (3.36-3.91)       | <0.001  | 5.33 (4.90-5.80)       | <0.001  |
| Black                | 4.69 (4.34-5.07)       | <0.001  | 5.43 (4.96-5.94)       | <0.001  |
| Chinese              | 2.47 (2.02-3.01)       | <0.001  | 5.66 (4.58-6.99)       | <0.001  |
| Undiagnosed diabetes |                        |         |                        |         |
| White                | 1 Referent             |         | 1 Referent             |         |
| South Asian          | 5.29 (4.65-6.02)       | <0.001  | 7.05 (6.11-8.14)       | <0.001  |
| Black                | 4.43 (3.78-5.19)       | <0.001  | 4.00 (3.37-4.76)       | <0.001  |
| Chinese              | 1.60 (0.98-2.66)       | 0.073   | 4.41 (2.63-7.39)       | <0.001  |

OR Odds ratio; CI confidence interval

Model1: Unadjusted

Model 2: Adjusted for sociodemographic factors (sex, age, deprivation), BMI and lifestyle score, at baseline
